# Supplementary material for: SGLT2 Inhibitors in COVID-19: Umbrella Review, Meta-analysis, and Bayesian Sensitivity Assessment
Source: Research Square preprint supplement (doi:10.21203/rs.3.rs-4289010/v1), 2024-04-23
Supplement: Supplementary file 1 [file 010e3bed4679a60f2fd31cfe.docx]

Supplementary table 4. Critical Appraisal Tool for the Risk of Bias in Systematic Reviews from the Joanna Briggs Institute for Systematic Reviews and Research Syntheses

| Title | Author | Year | 1. PICO compone nts | 2. Review methods | 3. Study selection | 4. Literature search | 5. Study selection | 6. Data extraction | 7. Exclusion justification | 8. Study description | 9. Included studies risk of bias | 10. Included studies funding | 11. Statistical methods | 12. Risk of bias impact | 13. Risk of bias accountability | 14. Heterogeneity | 15. Publication bias | 16. Conflict of interest | Results |
| --- | --- | --- | --- | --- | --- | --- | --- | --- | --- | --- | --- | --- | --- | --- | --- | --- | --- | --- | --- |
| Association of Glucose-Lowering Drugs With Outcomes in Patients With Diabetes Before Hospitalization for COVID-19: A Systematic Review and Network Meta-analysis. | Zhu et.al. | 2022 | Y | PY | Y | Y | Y | Y | N | PY | Y | N | Y | Y | Y | N | Y | Y | Included |
| The Association Between Antidiabetic Agents and Clinical Outcomes of COVID-19 Patients With Diabetes: A Bayesian Network Meta-Analysis. | Chen et.al. | 2022 | Y | Y | Y | Y | N | Y | N | PY | Y | Y | Y | Y | Y | Y | Y | Y | Included |
| Sodium-glucose cotransporter-2 inhibitor-associated euglycemic diabetic ketoacidosis in COVID-19-infected patients: A systematic review of case reports | Khedr st.al. | 2023 | Y | Y | Y | Y | Y | Y | PY | PY | N | N | Y | N | N | Y | Y | Y | Included |
| Effect of Antidiabetic Therapy on Clinical Outcomes of COVID-19 Patients With Type 2 Diabetes: A Systematic Review and Meta-Analysis | Zhan | 2023 | Y | PY | Y | Y | Y | Y | N | PY | Y | Y | Y | Y | Y | Y | Y | Y | Included |
| Noninsulin-based antihyperglycemic medications in patients with diabetes and COVID-19: A systematic review and meta-analysis | Nassar | 2023 | Y | N | Y | Y | Y | Y | PY | Y | Y | Y | Y | Y | Y | Y | Y | Y | Included |
| Pre-admission use of sodium glucose transporter-2 inhibitor (SGLT-2i) may significantly improves Covid-19 outcomes in patients with diabetes: A systematic review, meta-analysis, and meta-regression | Permana | 2023 | Y | Y | Y | Y | Y | Y | PY | PY | Y | Y | Y | Y | Y | Y | Y | Y | Included |
| Effects of novel glucose-lowering drugs on the COVID-19 patients with diabetes: A network meta-analysis of clinical outcomes | Yang | 2023 | Y | Y | Y | Y | Y | Y | N | PY | Y | Y | Y | Y | Y | Y | Y | Y | Included |
| Preadmission use of antidiabetic medications and mortality among patients with COVID-19 having type 2 diabetes: A meta-analysis | Nguyen | 2022 | Y | Y | Y | Y | Y | Y | N | PY | Y | Y | Y | Y | Y | Y | Y | Y | Included |
| Association Between Anti-diabetic Agents and Clinical Outcomes of COVID-19 in Patients with Diabetes: A Systematic Review and Meta-Analysis | Han | 2022 | Y | Y | Y | Y | Y | Y | N | PY | Y | Y | Y | N | N | Y | Y | Y | Included |
| Diabetes-related acute metabolic emergencies in COVID-19 patients: a systematic review and meta-analysis | Papadopoulos | 2021 | Y | Y | Y | Y | Y | Y | N | Y | Y | Y | Y | Y | Y | Y | Y | Y | Included |
