# Supplementary material for: SGLT2 Inhibitors in COVID-19: Umbrella Review, Meta-analysis, and Bayesian Sensitivity Assessment
Source: Research Square preprint supplement (doi:10.21203/rs.3.rs-4289010/v1), 2024-04-23
Supplement: Supplementary file 2 [file 056f88b6339928150f29ea90.docx]

|  | Research question 1 | Research question 2 | Research question 3 |
| --- | --- | --- | --- |
| **Population** | Hospitalized COVID-19 patients | COVID-19 patients | COVID-19 patients |
| **Intervention** | SGLT2i | History of SGLT2i use | History of SGLT2i use |
| **Comparator** | Placebo | No history of SGLT2i use | No history of SGLT2i use |
| **Outcomes** | Efficacy:  Mortality, need for mechanical ventilation, ICU admission, hospital discharge, and other clinically relevant and statistically homogenous outcomes at each time point reported in 2 or more studies    Safety:  Diabetic ketoacidosis, acute kidney injury, and other clinically relevant and statistically homogenous outcomes at each time point reported in 2 or more studies | Efficacy:  Mortality, need for mechanical ventilation, ICU admission, hospitalization, and other clinically relevant and statistically homogenous outcomes reported in 2 or more studies    Safety:  Diabetic ketoacidosis, acute kidney injury, and other clinically relevant and statistically homogenous outcomes reported in 2 or more studies | Efficacy:  Mortality, need for mechanical ventilation, ICU admission, hospitalization, and other clinically relevant and statistically homogenous outcomes reported in 2 or more studies    Safety:  Diabetic ketoacidosis, acute kidney injury, and other clinically relevant and statistically homogenous outcomes reported in 2 or more studies |
| **Study design** | Randomized controlled trials | All original studies (interventional or observational) answering the above research question | All systematic reviews and meta-analysis |
| **Statistical measure** | Risk ratio | Odds ratio | Odds ratio |

**Supplementary Table 1.** The PICO (Population, Intervention, Comparator, Outcomes) elements of the research questions of the review
