# Supplementary material for: SGLT2 Inhibitors in COVID-19: Umbrella Review, Meta-analysis, and Bayesian Sensitivity Assessment
Source: Research Square preprint supplement (doi:10.21203/rs.3.rs-4289010/v1), 2024-04-23
Supplement: Supplementary file 3 [file 2ab88a80b52597603100184e.docx]

**Table 2**. Characteristics of the included systematic reviews and meta-analyses.

| Title | Author-year | Type of Review | Population | Outcome | Conclusion | Class of evidence |
| --- | --- | --- | --- | --- | --- | --- |
| Association of Glucose-Lowering Drugs With Outcomes in Patients With Diabetes Before Hospitalization for COVID-19: A Systematic Review and Network Meta-analysis. | Zhu Z, 2022 | Systematic review and network meta-analysis | Patients with diabetes while receiving glucose-lowering therapies for at least 14 days before the confirmation of COVID-19 infection | Need for intensive care unit admission, invasive and noninvasive mechanical ventilation, and in-hospital death. | Use of an SGLT-2i before COVID-19 infection is associated with lower COVID–19–related adverse outcomes | Class III |
| The Association Between Antidiabetic Agents and Clinical Outcomes of COVID-19 Patients With Diabetes: A Bayesian Network Meta-Analysis. | Chen Y, 2022 | Bayesian Network Meta-analysis | Diabetic COVID-19 patients receiving specific antidiabetic agents | Metformin, dipeptidyl peptidase-4 inhibitors (DPP4i), sodium-glucose cotransporter-2 inhibitors (SGLT2i) (OR, 0.82; P=0.001), and glucagon-like peptide-1 receptor agonists (GLP1RA) treatment were associated with lower COVID-19 mortality in individuals with diabetes compared to respective nonusers | Metformin, DPP4i, SGLT2i, and GLP1RA treatments were highly possible to reduced COVID-19 mortality risk in individuals with diabetes | Class IV |
| Sodium-glucose cotransporter-2 inhibitor-associated euglycemic diabetic ketoacidosis in COVID-19-infected patients: A systematic review of case reports | Khedr, A., 2023 | Systematic review of case reports | SGLT2 inhibitors in coronavirus disease 2019 (COVID-19) in diabetic patients developing DKA | Clinical manifestations, treatment approaches, and outcomes of eu-DKA in patients with concurrent COVID-19 infection. | SGLT2 inhibitors may increase the risk of euglycemic diabetic ketoacidosis in COVID-19-infected diabetic patients. | Non-significant |
| Effect of Antidiabetic Therapy on Clinical Outcomes of COVID-19 Patients With Type 2 Diabetes: A Systematic Review and Meta-Analysis | Zhan, K., 2023 | Systematic Review and Meta-analysis | COVID-19 patients with T2D taking one of the anti-diabetes drugs; | COVID-19-related deaths and other poor clinical outcomes, including ICU admission and invasive mechanical ventilation | Usage of metformin, SGLT-2i, and GLP-1ra could significantly decrease mortality in COVID-19 patients with T2D | Class IV |
| Noninsulin-based antihyperglycemic medications in patients with diabetes and COVID-19: A systematic review and meta-analysis | Nassar, M., 2023 | Systematic Review and Meta-analysis | Patients with type 2 diabetes (T2D) who were infected with COVID-19. | Effect of different AGMs on mortality, hospitalization, and admission to the ICU and/or mechanical ventilation. | There was a decrease in the risk of hospitalization with SGLT-2i. | Class IV |
| Pre-admission use of sodium glucose transporter-2 inhibitor (SGLT-2i) may significantly improves Covid-19 outcomes in patients with diabetes: A systematic review, meta-analysis, and meta-regression | Permana, H., 2023 | Systematic review, meta-analysis, and meta-regression | SGLT-2i in diabetic patients with Covid-19 | Mortality from COVID-19, severe Covid-19 and diabetic ketoacidosis (DKA). | The use of SGLT-2i as glucose-lowering treatment in diabetic patients may reduce mortality and severity of COVID-19 but without increased risk of developing diabetic ketoacidosis (DKA). | Class III |
| Effects of novel glucose-lowering drugs on the COVID-19 patients with diabetes: A network meta-analysis of clinical outcomes | Yang, Y., 2023 | Network meta-analysis | Adults (aged ≥ 18 years) with diabetic COVID-19. Intervention measures are novel glucose-lowering drugs (e.g., SGLT2i, GLP-1RA, and DPP4i). | The primary outcome was the mortality of people with diabetes and COVID-19, and the secondary outcomes were the required intensive care unit (ICU) admission and mechanical ventilation. | SGLT2i is associated with a lower mortality rate in people with diabetes and COVID-19. And SGLT2i is linked to lower requiring mechanical ventilation. | Class III |
| Preadmission use of antidiabetic medications and mortality among patients with COVID-19 having type 2 diabetes: A meta-analysis | Nguyen, N.N., 2022 | Meta-analysis | Patients with confirmed COVID-19 who had diabetes and were on prehospital medications extending to the pandemic. | The primary outcome was in-hospital mortality or mortality within 90 days | Metformin, GLP-1RA, and SGLT-2i were associated with lower mortality rates in patients with COVID-19 having type 2 diabetes. | Class IV |
| Association Between Anti-diabetic Agents and Clinical Outcomes of COVID-19 in Patients with Diabetes: A Systematic Review and Meta-Analysis | Han, T., 2022 | Systematic Review and Meta-Analysis | Patients were older than 18 years of age and diagnosed with both diabetes and COVID-19; c) Home use or in-hospital use of specific anti-diabetic agents. | Clinically validated definition of death, poor composite outcomes comprised of intubation ventilation, Acute Respiratory Distress Syndrome (ARDS), Disseminated intravascular coagulation (DIC), intensive care unit (ICU) admission, disease progression, or other adverse outcomes. | Metformin might be beneficial in decreasing mortality and poor composite outcomes in diabetic patients infected with SARS-CoV-2. DPP-4 inhibitors, sulfonylurea/glinides, SGLT-2 inhibitors, and GLP-1RA would not be adverse. | Class IV |
| Diabetes-related acute metabolic emergencies in COVID-19 patients: a systematic review and meta-analysis | Papadopoulos, V.P., 2021 | Systematic review and meta-analysis | COVID-19 patients who had developed either DKA, HHS, or combined DKA/ HHS, or EDKA before administration of antidiabetic treatment, including insulin, metformin, sulfonylureas, dipeptidyl peptidase-4 inhibitors (DPP-4i), glucagon-like peptide-1 receptor agonists (GLP-1 RAs), SGLT-2i, and pioglitazone, | Primary (survival/discharge vs. death) and secondary (type of metabolic emergency) outcome concerning origin, the coexistence of ketotic and hyperosmotic state | Previous SGLT-2i treatment, though associated with EDKA, might preserve renal function in COVID-19 patients. | Class III |
