# Supplementary material for: SGLT2 Inhibitors in COVID-19: Umbrella Review, Meta-analysis, and Bayesian Sensitivity Assessment
Source: Research Square preprint supplement (doi:10.21203/rs.3.rs-4289010/v1), 2024-04-23
Supplement: Supplementary file 4 [file 37b07b4f932a087f5f5f4ce2.docx]

Supplementary table 3. Critical Appraisal for observational studies using the ROBINS-I tool for non-randomized studies of interventions

| **Author - Year** | **Confounding** | **Selection of participants** | **Classification of interventions** | **Deviations from intended interventions** | **Missing data** | **Measurement of outcomes** | **Selection of reported results** | **Overall** |
| --- | --- | --- | --- | --- | --- | --- | --- | --- |
| Kahkoska 2021 | Serious | Moderate | Moderate | Low | Low | Moderate | Low | Serious |
| Israelsen 2021 | Serious | Moderate | Moderate | Low | Low | Moderate | Low | Serious |
| Monda 2023 | Serious | Moderate | Moderate | Low | Low | Low | Low | Serious |
| Ozbek 2023 | Serious | Critical | Moderate | Low | Low | Moderate | Low | Critical |
| Salgado-Barreira 2023 | Moderate | Low | Moderate | Low | Low | Moderate | Low | Moderate |
| Foresta 2023 | Serious | Moderate | Moderate | Low | Low | Moderate | Low | Serious |
| Khunti 2022 | Serious | Moderate | Moderate | Low | Low | Moderate | Low | Serious |
| Israel 2021 | Moderate | Moderate | Moderate | Low | Low | Low | Low | Moderate |
| Min 2022 | Moderate | Low | Moderate | Low | Low | Low | Low | Moderate |
| Ramos-Rincón 2021 | Serious | Moderate | Moderate | Low | Serious | Moderate | Low | Serious |
| Orioli 2020 | Serious | Moderate | Moderate | Low | Serious | Moderate | Low | Serious |
| Wander 2021 | Serious | Moderate | Moderate | Low | Low | Low | Low | Serious |
| Shestakova 2022 | Serious | Moderate | Moderate | Low | No information | Moderate | Low | Serious |
| Dalan 2021 | Serious | Moderate | Moderate | Low | No information | Moderate | Moderate | Serious |
| Silverii 2020 | Serious | Moderate | Moderate | Low | No information | Low | Low | Serious |
| Yeh 2022 | Serious | Moderate | Moderate | Low | Low | Low | Low | Serious |
| Sourij 2020 | Serious | Moderate | Moderate | Low | Low | Moderate | Low | Serious |
