# Supplementary material for: SGLT2 Inhibitors in COVID-19: Umbrella Review, Meta-analysis, and Bayesian Sensitivity Assessment
Source: Research Square preprint supplement (doi:10.21203/rs.3.rs-4289010/v1), 2024-04-23
Supplement: Supplementary file 5 [file 39251e72fb5b79565c99dddb.docx]

**Supplementary table 2.** GRADE Assessment of SGLT2 Inhibitor Effects on COVID-19 Outcomes

| **Certainty assessment** | | | | | | | **№ of patients** | | **Effect** | **Certainty** | **Importance** |
| --- | --- | --- | --- | --- | --- | --- | --- | --- | --- | --- | --- |
| **No of studies** | **Study design** | **Risk of bias** | **Inconsistency** | **Indirectness** | **Imprecision** | **Other considerations** | **SGLT2i use** | **Non-use of SGLT2i** | **Odds Ratio** |
| **(95% CI)** |
| **Mortality** | | | | | | | | | | | |
| **12** | **Non-randomised studies** | **Not serious** | **Not serious** | **Not serious** | **Not serious** | **None** | **20418** | **104254** | **OR 0.67** | **⨁⨁◯◯** | **CRITICAL** |
| **(0.53 to 0.84)** | **Low** |
| **Hospitalization** | | | | | | | | | | | |
| **8** | **Non-randomised studies** | **Not serious** | **Not serious** | **Not serious** | **Not serious** | **None** | **26827** | **165230** | **OR 0.84** | **⨁⨁◯◯** | **CRITICAL** |
| **(0.75 to 0.94)** | **Low** |
| **ICU admission** | | | | | | | | | | | |
| **3** | **Non-randomised studies** | **Not serious** | **Seriousa** | **Not serious** | **Very seriousb** | **None** | **5801** | **60046** | **OR 0.93** | **⨁◯◯◯** | **CRITICAL** |
| **(0.82 to 1.06)** | **Very low** |
| **Mechanical ventilation** | | | | | | | | | | | |
| **3** | **Non-randomised studies** | **Not serious** | **Not serious** | **Not serious** | **Very seriousb** | **None** | **3763** | **10374** | **OR 0.82** | **⨁◯◯◯** | **CRITICAL** |
| **(0.50 to 1.36)** | **Very low** |
| **Emergency visits** | | | | | | | | | | | |
| **1** | **Non-randomised studies** | **Not serious** | **Not serious** | **Not serious** | **Very seriousb** | **None** | **3504** | **9650** | **OR 0.96** | **⨁◯◯◯** | **CRITICAL** |
| **(0.88 to 1.04)** | **Very low** |
| **Diabetic ketoacidosis** | | | | | | | | | | | |
| **2** | **Non-randomised studies** | **Not serious** | **Not serious** | **Not serious** | **Very seriousc** | **None** | **283** | **3029** | **OR 1.20** | **⨁◯◯◯** | **CRITICAL** |
| **(0.64 to 2.27)** | **Very low** |
| **Acute kidney injury** | | | | | | | | | | | |
| **1** | **Non-randomised studies** | **Not serious** | **Not serious** | **Not serious** | **Very seriousb** | **None** | **53** | **192** | **OR 0.81** | **⨁◯◯◯** | **CRITICAL** |
| **(0.44 to 1.49)** | **Very low** |

**CI:** confidence interval; **OR:** odds ratio

#### Explanations

a. The point estimates point in both directions. Thus, the evidence certainty is downgraded by one level for inconsistency.

b. The point estimate suggests benefit, and the CI includes the possibility of important harm. Thus, the evidence certainty is downgraded by two levels for imprecision.

c. The point estimate suggests harm, and the CI includes the possibility of important benefit. Thus, the evidence certainty is downgraded by two levels for imprecision.
