# Supplementary material for: SGLT2 Inhibitors in COVID-19: Umbrella Review, Meta-analysis, and Bayesian Sensitivity Assessment
Source: Research Square preprint supplement (doi:10.21203/rs.3.rs-4289010/v1), 2024-04-23
Supplement: Supplementary file 6 [file 465c6b5d3df90418c02e41e4.docx]

Table 1. Population characteristics of the observational studies included in the review

| Title | Author-year | Study Design | Population | Age | Sex | Outcome | Conclusion |
| --- | --- | --- | --- | --- | --- | --- | --- |
| Empagliflozin in patients admitted to hospital with COVID-19 (RECOVERY): a randomised, controlled, open-label, platform trial. | RECOVERY Collaborative Group, 2023 | Randomised Control Trial | Hospitalized patients with confirmed COVID-19 infection. | 61.1 (mean age) | 37% female, 63% male | All-cause mortality, discharge from hospital, Invasive mechanical ventilation, and death. | Epagliflozin showed no impact on 28-day mortality, hospital stay, or the risk of progressing to invasive ventilation or death. |
| Dapagliflozin in patients with cardiometabolic risk factors hospitalised with COVID-19 (DARE-19): a randomised, double-blind, placebo-controlled, phase 3 trial. | Kosiborod, 2021 | Randomised Control Trial | Adults hospitalised with COVID-19 with at least one Cardiometabolic risk factor. | 61.4 (mean age) | 42.6% female, 57.4% male | Time to new/worsened respiratory, cardiovascular, or kidney dysfunction during hospital stay, 30-day all-cause mortality, Composite Kidney outcome, days alive without mechanical ventilation, and time to hospital discharge. | Dapagliflozin did not significantly reduce organ dysfunction or death but was well tolerated. |
| Association Between Glucagon-Like Peptide 1 Receptor Agonist and Sodium-Glucose Cotransporter 2 Inhibitor Use and COVID-19 Outcomes. | Kahkoska, 2021 | Retrospective Observational Study | COVID-19-positive adults with a GLP1-RA, SGLT2i, or DPP4i prescription within 24 months of a positive COVID-19 test. | 58.6 ± 13.1 years | 53.4% female, 46.6% male. | 60-day mortality, total mortality, hospitalisation, and mechanical ventilation within 14 days. | Premorbid SGLT-2i use was linked to lower mortality and adverse outcomes. |
| Comparable COVID-19 outcomes with current use of GLP-1 receptor agonists, DPP-4 inhibitors or SGLT-2 inhibitors among patients with diabetes who tested positive for SARS-CoV-2. | Israelsen, 2021 | Cohort Study | Adults infected with COVID-19 with a previous diagnosis of diabetes. | 58 - 68 (Median age = 59) | 38.2% female, 61.8% male. | Hospital admission, ICU admission, mechanical ventilation, and 30 Day Mortality. | GLP-1 RA and DPP-4i did not improve outcomes compared to SGLT-2i in diabetes with SARS-CoV-2. |
| Protective Effects of Home T2DM Treatment with Glucagon-Like Peptide-1 Receptor Agonists and Sodium-Glucose Co-transporter-2 Inhibitors Against Intensive Care Unit Admission and Mortality in the Acute Phase of the COVID-19 Pandemic: A Retrospective Observational Study in Italy | Monda, 2023 | Retrospective Observational Study | Hospitalised COVID-19 patients with Type-2 DM with premorbid use of Sglt-2i, Glp1-Ra, or Dpp-4i monotherapy. | 61 ± 8 years | male/female ratio = 0.9 | Mortality rate. | GLP-1ra and SGLT-2i can be considered drugs of choice for diabetic COVID-19 patients. |
| The effect of dapagliflozin use on cardiovascular outcomes in type 2 diabetic patients hospitalized with COVID-19 | Ozbek, 2023 | Case-Control Study | Diabetic patients hospitalised with COVID-19. | 64.32 ± 10.92 years | 52.2% female, 47.8% male | Major adverse cardiovascular events, All-cause mortality. | Dapagliflozin reduced mortality risk and ICU admission in diabetic COVID-19 patients. |
| Effect of dapagliflozin on COVID-19 infection and risk of hospitalization. | Salgado-Barreira, 2023 | Case-Control Study | Adults with PCR-positive COVID-19 infection. | 59 - 84 (mean age 73) | male/female ratio = 1 | Hospitalization, ICU admission, in-hospital death, and progression to severe COVID-19. | Dapagliflozin before SARS-CoV-2 infection did not increase risks. |
| Dipeptidyl Peptidase-4 Inhibitors, Glucagon-like Peptide-1 Receptor Agonists, and Sodium-Glucose Cotransporter-2 Inhibitors and COVID-19 Outcomes. | Foresta, 2023 | Retrospective Cohort Study | Adults > 40 years with at least 2 prescriptions of DPP-4i, GLP-1 RA, or SGLT-2i or any other antihyperglycemic drug and a diagnosis of COVID-19. | Mean 71.86 years | 40.3 female, 59.7 male | Hospitalisation, In-Hospital Mortality, all-cause mortality. | DPP-4i users had reduced COVID-19 mortality risk; GLP-1 RA and SGLT-2i showed positive trends. |
| Association Between SGLT2 Inhibitor Treatment and Diabetic Ketoacidosis and Mortality in People With Type 2 Diabetes Admitted to Hospital With COVID-19. | Khunti, 2022 | Retrospective Cohort Study | Adults with Type-2 DM who were admitted to the hospital with COVID-19 infection. | 72 years (mean age) | 37.7% female, 62.3% male | DKA development and death in different cohorts | SGLT2i prescription had low DKA risk and no increased in-hospital mortality in T2D with COVID-19. |
| Identification of drugs associated with reduced severity of COVID-19: a case-control study in a large population | Israel, 2021 | Case-Control Study | Adults hospitalised with COVID-19 infection. | 64.6 (mean age) | male/female ratio = 1 | Hospital admission. | Antidiabetic drugs showed protective effects against COVID-19 severity. |
| Association between antidiabetic drug use and the risk of COVID‐19 hospitalization in the INSIGHT Clinical Research Network in New York City | Min, 2022 | Retrospective Cohort Study | Adult patients in the INSIGHT CRN with evidence of T2D and at least one HbA1c and serum creatinine measurement in the year prior to the index date of 15 March 2020 | 62 ± 13 years | Female = 51%, Male = 49% | Risk of COVID‐19 Hospitalisation | Sulphonylureas, DPP-4 inhibitors, and GLP-1 agonists increased COVID-19 hospitalization risk in T2D with metformin. |
| Cardiometabolic therapy and mortality in very old patients with diabetes hospitalized due to COVID‐19 | Ramos-Rincón, 2021 | ObservationalStudy | Patients ≥80 years with type 2 diabetes mellitus hospitalised for COVID-19 between March 1 and May 29, 2020 | Mean age 86 (82.7 - 88.9) | Female = 47.1%, Male = 52.9% | In-hospital mortality was the primary outcome. | DPP-4 inhibitors and angiotensin receptor blockers were protective; acetylsalicylic acid increased in-hospital mortality. |
| Clinical characteristics and short-term prognosis of in-patients with diabetes and COVID-19: A retrospective study from an academic center in Belgium | Orioli, 2020 | Retrospective Study | patients with known or newly diagnosed diabetes and confirmed COVID-19. | Mean age was 69 (±14) years | Female = 52.0 %, Male = 48.0 % | Predictive factors of in-hospital death, diabetic patients with SARS-CoV-2 pneumonia were matched for age and sex with non-diabetic patients with SARS-CoV-2 pneumonia, to study the prognosis and predictive factors of in-hospital death related to diabetes. | Diabetes comorbidities did not adversely affect mortality; confirmation needed in larger series. |
| Prior Glucose-Lowering Medication Use and 30-Day Outcomes Among 64,892 Veterans With Diabetes and COVID-19 | Wander, 2021 | Retrospective Study | Patients with diabetes and one or more positive nasal swab(s) for severe acute respiratory syndrome coronavirus 2 (1 March 2020–10 March 2021) (n = 64,892). | Mean age of 67.7 | Female = 6.0 %, Male = 94.0 % | Associations of HbA1c and glucose-lowering medication use with hospitalisation, intensive care unit (ICU) admission, and mortality at 30 days. | Higher HbA1c and insulin use linked to adverse outcomes; GLP1-RA, metformin, and SGLT2i were protective. |
| Risk factors for COVID-19 case fatality rate in people with type 1 and type 2 diabetes mellitus: A nationwide retrospective cohort study of 235,248 patients in the Russian Federation | Shestakova, 2022 | Retrospective Cohort study | Patients with DM of the National Diabetes Register (NDR) with a reported outcome of coronavirus infection. | NA | 32%) Males and 68% Females. | Association of demographic, clinical, and laboratory characteristics, pre-COVID-19 glucose-lowering therapy (in T2DM), and anti-COVID-19 vaccination status with the fatality cases due to COVID-19 and identify the risk factors for the death. | COVID-19 fatality risk increased with male gender, older age, longer DM duration; positive effects with certain glucose-lowering therapies. |
| The association of hypertension and diabetes pharmacotherapy with COVID-19 severity and immune signatures: an observational study | Dalan, 2021 | Observational study | Patients with PCR confirmed COVID-19 who were hospitalised at the National Centre of Infectious Diseases (NCID), Singapore up to 15 April 2020. | NA | NA | Hypoxia (requirement for supplemental oxygen to maintain blood oxygen saturations >93%), intensive care unit (ICU) admission, mechanical ventilation, and death. | Health complications in hypertension and type 2 diabetes; Diabetes and hypertension linked to hypoxia and ICU admission. ACE-I in hypertensive patients lowered ICU admission risk; ARBs increased it. DPP4i in diabetics increased ICU risk, while SGLT2i reduced mechanical ventilation risk. ARB use linked to higher inflammation; DPP4i linked to lower neurotrophic factor levels. |
| Are diabetes and its medications risk factors for the development of COVID-19? Data from a population-based study in Sicily | Silverii, 2020 | Retrospective Observational Study | Patients with SARS-CoV-2 positive (SARS-CoV-2þ) cases and deaths in Sicily region, up to 2020, May 14th. | Mean age was 73.31 (± 12.66) years | Female = 45.9%, Male = 54.1% | Association of diabetes with COVID-19 prevalence and case fatality and the association between different diabetes medications and risk for COVID-19 infection and death. | DM was not a risk factor for COVID-19 infection, instead was associated with a higher case fatality. |
| Hospitalization and mortality in patients with COVID-19 with or at risk of type 2 diabetes: data from five health systems in Pennsylvania and Maryland | Yeh, 2022 | Retrospective Cohort Study | Adult patients with type 2 diabetes or at risk of type 2 diabetes using the PaTH Toward a Learning Health System (PaTH) clinical data research network. | Mean age was 62.3 (± 14.0) years | Female = 53.8 %, Male = 46.2 % | To measure COVID-19 severity, Patients were classified into three categories based on 30-day outcomes as indicated by site of care: (1) no hospitalisation; (2) hospitalisation only; or (3) admission to the ICU, intubation, or death. | Type 2 diabetes and insulin use increased ICU/intubation/death odds; metformin lowered odds. GLP-1 RA, DPP-4i, and metformin users had lower hospitalization odds. Non-Hispanic Black and Hispanic diabetes-risk patients had higher hospitalization odds. Later COVID-19 diagnoses associated with lower severe outcomes odds. |
| COVID-19 fatality prediction in people with diabetes and prediabetes using a simple score upon hospital admission | Sourij, 2020 | Retrospective Cohort Study | People aged 18 years or older with a confirmed positive throat swab for SARS-CoV-2 and a confirmed diagnosis of type 1 diabetes, type 2 diabetes or prediabetes were included in the registry (either known or newly diagnosed). | Mean age of people hospitalized (n = 238) for COVID-19 was 71.1 ± 12.9 years | Females = 36.4%, Males = 63.6 % | In-hospital mortality in patients with diabetes and confirmed diagnosis of COVID-19. | The in-hospital mortality for COVID-19 was high in people with diabetes but not significantly different to the risk in people with prediabetes. |
